# Supplementary material for: Traceless solid phase synthesis of 2-substituted pyrimidines using an ‘off-the-shelf’ chlorogermane-functionalised resin
Source: Royal Society of Chemistry journal article supplement (doi:10.1039/b303064d), 2003-01-01
Supplement: b303064d.doc [file b303064d.doc]

# Traceless Solid Phase Synthesis of 2-Substituted Pyrimidines Using an ‘Off-the-Shelf’ Chlorogermane-Functionalised Resin

# Alan C. Spivey,Ratnasothy Srikaran, Christopher M. Diaper and David J. Turner

# Supporting Information

**General Directions:**

All reactions were performed under anhydrous conditions and an atmosphere of nitrogen in flame‑dried glassware. Yields refer to chromatographically and spectroscopically (1H NMR) homogenous materials, unless otherwise indicated. ***Solvents and reagents:*** All solvents were distilled before use. ‘Petrol’ refers to the fraction of light petroleum-ether boiling between 40 – 60°C. Commercial grade solvents used for flash chromatography were distilled before use. Anhydrous solvents were obtained as follows:DMF: Stirred over MgSO4 under nitrogen for 24h, distilled under reduced pressure, and stored over molecular sieves (4Å) under nitrogen. MeNO2: Distilled from CaH2 under nitrogen immediately prior to use. THF and Et2O: Distilled from sodium/benzophenone ketyl under nitrogen immediately prior to use. ‘Degassed’ refers to solutions that have been subjected to three successive freeze-thaw cycles on a nitrogen/high-vacuum line. All chemicals were handled in accordance with COSHH regulations. All reagents were used as commercially supplied. ***Chromatography:*** Flash chromatography was carried out using Merck Kiesegel 60 F254 (230‑400 mesh) silica gel. Only distilled solvents were used as eluents. Thin layer chromatography (TLC) was performed on Merck which were visualised either by quenching of ultraviolet fluorescence (max = 254 nm) or by charring with 10% KMnO4 in 1M H2SO4. ***Infra red spectra:*** These were recorded as thin KBr disks on a Perkin-Elmer Paragon 1000 Fourier transform spectrometer. Only selected absorbances (max) are reported. ***1H NMR spectra***: These were recorded at 250 MHz on a Bruker AM-250 instrument. Chemical shifts (H) are quoted in parts per million (ppm), referenced to the appropriate residual solvent peak. Coupling constants (*J*) are reported to the nearest Hz. ***13C NMR spectra:*** These were recorded at 63 MHz on a Bruker AM-250 instrument. Chemical shifts (C) are quoted in ppm, referenced to the appropriate solvent peak. ***Mass spectra:*** Low resolution mass spectra (m/z) were recorded on either a VG platform or VG prospec spectrometers, with only molecular ions (M+ or MH+), and major peaks being reported with intensities quoted as percentages of the base peak. High Resolution Mass Spectrometry (HRMS) measurements are valid to ±5 ppm. GC-MS was performed on a Perkin-Elmer turbo mass instrument with Phenomonex ZB-5 (5% phenylpolysiloxane) 30m x 0.25mm (id), 1mLmin-1 He carrier gas.

**Experimental Procedures:**

**Trimethylgermyl Quadragel™****resin**

A suspension of Quadragel**™**200mg, 1.4mmolg-1, 0.28mmol), SOCl2 (31L 0.42mmol, 1.5eq) and DMF (500L) in CCl4 (5mL) was agitated at room temperature for 16h. Then the resin was separated by filtration, washed with DMF (30mL), THF (30mL), Et2O (30mL), DCM (30mL) and dried under high vacuum for 24h to give a free flowing brown resin (227mg, 1.1mmolg-1, as determined by microanalysis); IR (KBr disk) 1726, 1325, 1043, 541 cm-1.

To a solution of trimethylgermylphenol **4**1 (120mg, 0.50mmol, 2eq) in CH3CN (10mL) was added Cs2CO3 (196mg, 0.55mmol, 2.2eq) and *n*-Bu4NI (9mg, 0.025mmol, 0.1eq). The resulting mixture was stirred at room temperature for 1h. Then the above chlorofunctionalised resin (227mg, 1.1mmolg-1, 0.25mmol) was added and the reaction mixture was refluxed at 90C for 20h. Resin was separated by filtration, washed with DMF (30mL), MeOH (30mL), THF (30mL), Et2O (30mL), DCM (30mL) and dried under high vacuum for 24h to give a free flowing brown trimethylgermyl resin (165mg, 1.0mmolg-1, as determined by the mass balance of initial and recovered phenol **4**). IR (KBr disk) 1610, 1510, 1246, 824, 700, 598 (Ge-C) cm-1.

**Chlorodimethylgermyl Quadragel™ resin 6**

Tin(IV)chloride (153L, 1.30mmol) was added dropwise to a suspension of trimethylgermyl resin (260mg, 1.0mmolg-1, 0.26mmol) in MeNO2 (5mL) at room temperature and then the reaction mixture heated at 50˚C for 20h. Then the resin was separated by filtration, washed with THF (30mL), Et2O (30mL), DCM (30mL) and dried under high vacuum for 48h to give a free flowing dark brown resin **6** (230mg, 0.8mmolg-1, as determined by microanalysis; IR (KBr disk) 1610, 1513, 1453, 1112, 1047, 700, 618 (Ge-C) cm-1.

**2-(4-Bromo-phenyl)-2-methyl-[1,3]dioxolane** [[1]](#endnote-2)

To a solution of 4-bromoacetophenone (5g, 25.1mmol) and ethylene glycol (3.7mL, 66.7mmol) in benzene (20mL) was added *p*-TsOH (478mg, 2.75mmol) and the reaction mixture refluxed at 90C with a Dean-Stark trap for 30h. After cooling, the reaction mixture was washed with saturated NaHCO3 (50mL), H2O (50mL) and brine (50mL) and extracted with DCM (3100mL). The organic fractions were collected, dried (MgSO4) and concentrated *in vacuo*. Purification by flash chromatography (petrol/ EtOAc, 9/1) gave the title dioxolane as a white solid (5.2g, 86%); mp 42-44C (petrol) [*cf*. 44-46C (petrol)[[2]](#endnote-3)]; 1H NMR (CDCl3):  1.63 (s, 3H), 3.73-3.76 (m, 2H), 4.02-4.05 (m, 2H), 7.33 (d, *J*= 8Hz, 2H), 7.46 (d, *J*= 8Hz, 2H); MS (EI+) *m/z* 242 (M+).

**4-Trimethylgermylacetophenone**2

A solution of *n*-BuLi (4.8mL, 1.6M, 7.7mmol) in hexanes was added dropwise to a solution of 2-(4-bromo-phenyl)-2-methyl-[1,3]dioxolane (1.89g, 7.9mmol) in THF (30mL) at -78C. To this mixture was added a solution of trimethylgermanium bromide (1mL, 0.79mmol) in THF (10mL) at -78C. After stirring for 15min, solid CO2 (1g) was added and the reaction mixture allowed to warm slowly to room temperature over 1.5h. The resulting solution was concentrated *in vacuo* to give a yellow oil. To this oil was added acetone (100mL), water (5mL) and PPTS (280mg) and the mixture refluxed for 16h at 67C before being concentrated *in vacuo*. The resulting yellow paste was dissolved in EtOAc (50mL) and washed successively with 10% NaHCO3 (50mL) and water (50mL). The organic layer was dried (MgSO4) and concentrated *in vacuo*. Purification by flash chromatography (hexane/EtOAc, 10/1) gave 4-trimethylgermylacetophenone as a colourless oil (1.31g, 71%).1H NMR (CDCl3):  0.40 (s, 9H), 2.59 (s, 3H) 7.57 (d, *J* = 8, 2H), 7.90 (2H, d, *J* = 8, 2H); 13C NMR (CDCl3):  –1.91 (q), 26.63 (q), 127.38 (d), 133.19 (d) 136.83 (s), 149.80 (s), 198.38 (s); IR (neat) 1682, 1272 cm-1; MS (ES+) *m/z* 256 (MNH4+).

**3-Dimethylamino-1-(4-trimethylgermanyl-phenyl)-propenone 7**

To a solution of 4-trimethylgermylacetophenone (50mg, 0.212mmol) in THF (1mL) was added *tert*-butoxybis(dimethylamino)methane (Bredereck’s reagent) (997mg, 5.72mmol) and the resulting mixture was refluxed at 70C for 3h. The solvents were removed *in vacuo*. Purification by flash chromatography (DCM/MeOH, 15/1) gave the enaminone **7** as a pale yellow solid (60mg, 85%); mp 70-72C (petrol); 1H NMR (CDCl3): δ 0.40 (s, 9H), 3.00 (br d, 6H), 5.73 (d, *J*= 12.5Hz, 1H), 7.53 (d, *J*= 8Hz, 2H), 7.80 (d, *J*= 12.5Hz, 1H), 7.86 (d, *J*= 8Hz, 2H); 13C NMR (CDCl3): -1.83 (q), 92.30 (q), 126.73 (d), 132.78 (d), 140.35 (s), 146.46 (s), 154.20 (d), 188.84 (s); IR (CHCl3) 3003, 1643 (C=O), 1566 (C=C), 1536, 1359, 1241, 1118, 1053, 900, 827, 770 cm-1; MS (EI+) *m/z* 293 (M+); HRMS (EI+) calcd. for C14H2174GeNO 293.0835, found 293.0822.

**2-Methyl-4-(4-trimethylgermanyl-phenyl)-pyrimidine 9**

To a solution of enaminone **7** (60mg, 0.254mmol) and acetamidine hydrochloride (72mg, 0.761mmol) in EtOH (5mL) was added NaOMe (51mg, 0.940mmol). The resulting mixture was refluxed at 85C for 12h and then partitioned between 0.2M NaOH (10mL) and DCM (330mL). The organic fractions were collected, dried (MgSO4) and concentrated *in vacuo*. Purification by flash chromatography (petrol/EtOAc, 7/3) gave 2-methylpyrimidine **9** as a white solid (51mg, 70%); mp 84-85C (petrol); 1H NMR (CDCl3): δ 0.40 (s, 9H), 1.65 (s, 3H), 7.50 (d, *J*= 5.5Hz, 1H), 7.61 (d, *J*= 8Hz, 2H), 8.05 (d, *J*= 8Hz, 2H), 8.64 (d, *J*= 5.5Hz, 1H); 13C NMR (CDCl3): δ –1.94 (q), 26.62 (q), 68.14 (s), 127.35 (d), 128.79 (d), 130.87 (d), 132.43 (s), 133.18 (d), 167.76 (s); IR (CHCl3) 2970, 1574, 1538, 1434, 820, 762 cm-1; MS (EI+) *m/z* 288 (M+); HRMS (EI+) calcd. for C14H1874GeN2 288.0682, found 288.0694.

**2-Phenyl-4-(4-trimethylgermanyl-phenyl)-pyrimidine 10**

To a solution of enaminone **7** (50mg, 0.171mmol) and benzamidine hydrochloride (81mg, 0.512mmol) in EtOH (5mL) was added NaOMe (35mg, 0.645mmol). The resulting mixture was refluxed at 85C for 12h and then partitioned between 0.2M NaOH (10mL) and DCM (330mL). The organic fractions were collected, dried (MgSO4) and concentrated *in vacuo*. Purification by flash chromatography (petrol/DCM, 1/1) gave 2-phenylpyrimidine **10** as a white solid (51mg, 70%); mp 92-94C (petrol); 1H NMR (CDCl3): δ 0.45 (s, 9H), 7.43-7.56 (m, 3H), 7.60 (d, *J*= 5Hz, 1H), 7.66 (d, *J*= 8Hz, 2H), 8.18 (d, *J*= 8Hz, 2H), 8.53-8.62 (m, 2H), 8.83 (d, *J*= 5Hz, 1H); 13C NMR (CDCl3): δ –1.80 (q), 114.54 (d), 126.48 (d), 128.03 (d), 128.30 (d), 128.55 (d), 130.70 (d), 132.96 (d), 133.58 (d), 136.86 (s), 137. 92 (s), 142.15 (s), 157. 83 (d), 164.07 (s), 166.08 (s); IR (CHCl3) 3014, 1565, 1205, 823, 759 cm-1; MS (EI+) *m/z* 350 (M+); HRMS (EI+) calcd. for C19H2074GeN2 350.0838, found 350.0833.

**4-Trimethylsilylacetophenone**[[3]](#endnote-4)

A solution of *n*-BuLi in hexanes (2.5M, 660L, 1.65mmol) was added dropwise to a solution of 2-(4-bromo-phenyl)-2-methyl-[1,3]dioxolane (400mg, 1.6mmol) and trimethylsilylchloride (420L, 3.31mmol) in THF (5mL) at -78C. After stirring for 6h at -78C , the reaction mixture allowed to warm slowly to room temperature over 14h. The resulting solution was concentrated *in vacuo* to give a yellow oil. To this oil was added acetone (5mL), water (2mL) and PPTS (13mg) and the mixture refluxed for 14h at 67C before being concentrated *in vacuo*. The resulting yellow paste was dissolved in EtOAc (5mL) and washed successively with 10% NaHCO3 (10mL) and water (10mL). The organic layer was dried (MgSO4) and concentrated *in vacuo*. Purification by flash chromatography (hexane/EtOAc, 10/1) gave 4-trimethylsilylacetophenone as a colourless oil (184mg, 58%).1H NMR (CDCl3):  0.31 (s, 9H), 2.59 (s, 3H) 7.55 (d, *J* = 8, 2H), 7.85 (2H, d, *J* = 8, 2H); 13C NMR (CDCl3):  –1.36 (q), 26.65 (q), 127.20 (d), 133.50 (d) 137.11 (s), 147.26 (s), 198.45 (s); MS (ES+) *m/z* 193 (MH+).

**3-Dimethylamino-1-(4-trimethylsilanayl-phenyl)-propenone 8**

To a solution of 4-trimethylsilylacetophenone (35mg, 0.182mmol) in THF (5mL) was added *tert*-butoxybis(dimethylamino)methane (Bredereck’s reagent) (188L, 0.911mmol, 5.0eq) and the resulting mixture was refluxed at 70C for 3h. The solvents were removed *in vacuo*. Purification by flash chromatography (DCM/MeOH, 15/1) gave the enaminone **8** as a colourless oil (35mg, 78%); 1H NMR (CDCl3): δ 0.25 (s, 9H), 3.04 (br d, 6H), 5.67 (d, *J*= 12.5Hz, 1H), 7.57 (d, *J*= 8Hz, 2H), 7.80 (d, *J*= 12.5Hz, 1H), 7.84 (d, *J*= 8Hz, 2H); MS (EI+) *m/z* 247 (M+); HRMS (EI+) calcd. for MH+ C14H22NOSi 248.1471, found 248.1483.

**Dimethylgermylacetophenyl Quadragel™ resin**

A solution of *n*-BuLi in hexanes (2.52mL, 2.5M, 6.30mmol) was added dropwise to a solution of 2-(4-bromo-phenyl)-2-methyl-[1,3]dioxolane (1.53g, 6.30mmol) in THF (10mL) at -78C. After stirring for 30 min, the reaction mixture was transferred by a cannula to a suspension of chlorodimethylgermylresin **6** (3.94g, 0.8mmolg-1, 3.15mmol) in THF (10mL) at –78C. The resulting mixture was allowed to react at -78C for 3h and then at room temperature for 8h. The resin was separated by filtration, washed with DMF (300mL), MeOH (300mL), THF (3100mL), Et2O (300mL), DCM (3100mL) and dried under high vacuum for 48h to give a free flowing yellow resin (3.81g). IR (KBr disk) 1610, 1511, 1453, 1245, 1114, 1042, 825, 700, 599 (Ge-C), 546 cm-1. This resin was suspended directly in THF/H2O (25/3mL) and PPTS (100mg, 0.397mmol) was added. After being refluxed at 70C for 15h the resin was separated by filtration, washed with DMF (300mL), MeOH (300mL), THF (3100mL), Et2O (300mL), DCM (3100mL) and dried under high vacuum for 48h to give a free flowing yellow resin (3.53g). IR (KBr disk) 1683 (C=O), 1610, 1510, 1245, 1115, 825, 700, 603 (Ge-C), 547 cm-1.

**Dimethylgermylenaminone Quadragel™ resin 11**

To a suspension of acetophenylresin (3.0g) in THF (25mL) was added Bredereck’s reagent (4.9mL, 23.9mmol) at room temperature and the resulting mixture was refluxed at 70C for 16h. The resin was separated by filtration, washed with THF (3100mL), Et2O (3100mL), DCM (350mL) and dried under high vacuum for 48h to give a free flowing yellow resin **11** (2.83g, 0.7mmolg-1, as determined by microanalysis). IR (KBr disk) 1645 (C=O), 1610, 1570 (C=C), 1510, 1245, 1115, 1047, 827, 700, 601 (Ge-C), 547 cm-1.

**General procedure for the preparation of Quadragel™ resin supported pyrimidines and their traceless cleavage with TFA**

To a suspension of enaminone resin **11** (30mg, 0.02mmol) in abs. EtOH (3mL) was added the appropriate amidine hydrochloride (50mg, 0.21-0.53mmol) followed by a solution of NaOMe in abs. EtOH (5.0M, 150L, 0.75mmol) and the resulting mixture was refluxed at 85˚C for 12h. The resin was separated by filtration, washed with DMF (350mL), MeOH (350mL), THF (350mL), Et2O (350mL), DCM (350mL) and dried under high vacuum for 20h to give the free flowing resin supported pyrimidine. This resin was suspended directly in freshly distilled TFA (1mL) and stirred for 12h. The resin was then separated by filtration and washed with DCM (3mL). The organic washings were collected and concentrated *in vacuo* to give the crude pyrimidines, which were subject to GC-MS analysis to determine the crude purity. Purification by PLC (petrol/EtOAc, 2/8) gave:

*2-Methyl-4-phenylpyrimidine* **12**[[4]](#endnote-5) as white solid (3.0mg, 85%). Rt 2.44min; MS (EI+) *m/z* 170 (M+); mp 50-52C (petrol) [*cf*. 54-55C (petrol)4]; 1H NMR (CDCl3): δ 2.80 (s, 3H), 7.42-7.48 (m, 4H), 7.98-8.06 (m, 2H), 8.60 (d, *J*= 5Hz, 1H); 13C NMR (CDCl3):  26.31 (q), 113.89 (d), 127.15 (d), 128.92 (d), 130.80 (d), 136.89 (s), 157.43 (d), 163.99 (s), 168.36 (s); HRMS (EI+) calcd. for C11H10N2 170.0844, found 170.0840.

*2-Ethyl-4-phenyl-pyrimidine*[[5]](#endnote-6) **13**, white solid (2.7mg, ~70%): Rt 2.64min; MS (EI+) 184 (M+); mp 60-61C [*cf*. 61-62C5].

*4-Phenyl-2-propyl-pyrimidine*5 **14**, white solid (2.6mg, ~65%): Rt 5.10min; MS (EI+) 198 (M+); mp 55-56C [*cf*. 58C5].

*2-Cyclopropyl-4-phenyl-pyrimidine* **15**, white solid (0.9 mg, ~20%): Rt 5.89min; MS (EI+) 196 (M+); 1H NMR [(CD3)2SO] δ 2.01 (m, 1H). 2.30 (m, 1H), 2.82-2.97 (2H), 3.25-3.34 (1H), 7.51-7.56 (3H), 7.94 (d, *J*=7Hz, 1H), 8.20-24 (2H), 8.83 (d, *J*=7Hz, 1H).

*2,4-Diphenylpyrimidine*[[6]](#endnote-7) **16**, white solid (4.0mg, ~80%). Rt 9.94min; MS (EI+) 232 (M+). mp 61-63C (DCM/petrol) [*cf*. 62-63C (DCM/petrol)6]; 1H NMR (CDCl3): δ 7.48-7.58 (m, 6H), 7.60 (d, *J*= 5Hz, 1H), 8.18-8.25 (m, 2H), 8.54-8.62 (m, 2H), 8.85 (d, *J*= 5Hz, 1H); 13C NMR (CDCl3):  114.54 (d), 127.25 (d), 128.31 (d), 128.57 (d), 128.97 (d), 130.77 (d), 131.02 (d), 157.78 (d); MS (FAB+) *m/z* 232 (M+).

*2-Naphthalen-2-yl-4-phenyl-pyrimidine* **17**, white solid (2.8mg, ~45%). Rt 14.30min; MS (EI+) 282 (M+).

*2-Benzyl-4-phenyl-pyrimidine* **18**, oil (0.7mg, ~15%). Rt 9.72min; MS (EI+) 246 (M+); 1H NMR (CD3OD) δ 4.30 (s, 2H), 7.19 (tt, *J*= 7,1Hz, 1H), 7.27 (app t, *J*=7Hz, 2H), 7.37 (d, *J*=7Hz, 2H), 7.49-7.56 (3H), 7.81 (d, *J*=7Hz, 1H), 8.14-8.18 (2H), 8.70 (d, *J*=7Hz, 1H); HRMS (EI+) calcd. for C17H14N2 246.1157, found 246.1165.

*2-(4-Fluoro-phenyl)-4-phenyl-pyrimidine*[[7]](#endnote-8) **19**, white solid (3.1mg, ~60%). Rt 9.63min; MS (EI+) 250 (M+); mp 72-74C [*cf*. 75-76C7].

*2-(4-Chloro-phenyl)-4-phenyl-pyrimidine*7 **20**, white solid (4.1mg, ~75%). Rt 5.30min; MS (EI+) 266 (M+).

*2-(4-Methoxy-benzyl)-4-phenyl-pyrimidine* **21**, oil (4.8mg, ~85%). Rt 12.60min; MS (EI+) 276 (M+); 1H NMR [(CD3)2SO] δ 3.70 (s, 3H), 4.18 (s, 3H), 6.85 (d, *J*=7Hz, 2H), 7.26 (d, *J*=7Hz, 2H), 7.52-7.56 (3H), 7.88 (d, *J*=7Hz, 1H), 8.16-8.20 (2H), 8.79 (d, *J*=7Hz, 1H).

*2-(2,4-Dichloro-benzyl)-4-phenyl-pyrimidine* **22**, oil (4.5mg, ~70%). Rt 13.72min; MS (EI+) 315 (M+).

*2-Phenoxymethyl-4-phenyl-pyrimidine* **23**, oil (2.3mg, ~40%). Rt 11.14min; MS (EI+) 262 (M+); 1H NMR (CDCl3, diagnostic peak) δ 5.40 (s, 2H); HRMS (EI+) calcd. for C17H14N2O 262.1106, found 262.1106.

*2-(4-Chloro-phenoxymethyl)-4-phenyl-pyrimidine* **24**, white solid (3.7mg, ~45%). Rt 6.82min; MS (EI+) 296 (M+).

*2-(4-tert-Butyl-phenoxymethyl)-4-phenyl-pyrimidine* **25**, oil (3.5mg, ~50%). Rt 8.91min; MS (EI+) 318 (M+).

*4-Phenyl-2-thiophen-2-yl-pyrimidine* **26**, oil (3.1mg, ~60%). Rt 3.80min; MS (EI+) 238 (M+).

*4-Phenyl-2-pyridin-2-ylpyrimidine* **27**, white solid (3.3mg, ~65%). Rt 4.37min; MS (EI+) 233 (M+).

*2-(2-Methyl-thiazol-4-yl)-4-phenyl-pyrimidine* **28**, white solid (0.6mg, ~10%). Rt 11.91min; MS (EI+) 253 (M+).

**References**

1. Yamakawa, T.; Kagechika, H.; Kawachi, E.; Hashimoto, Y.; Shudo, K. *J. Med. Chem.* 1990, **33**, 1430. [↑](#endnote-ref-2)
2. Detty, M. R.; Murray, B. J.; Smith, D. L.; Zumbulyadis, N. *J. Am. Chem. Soc.* 1983, **105**, 875. [↑](#endnote-ref-3)
3. Eaborn, C. Ghose, B. N.; Walton, D. R. M. *J.* *Organomet Chem.* 1974, **65**, 169. [↑](#endnote-ref-4)
4. Streef, J.W.; den Hertog, H. *Tetrahedron Lett.* 1968, **9**, 5945. [↑](#endnote-ref-5)
5. Bredereck, H. *Chem. Ber.* 1963, **96**, 1505. [↑](#endnote-ref-6)
6. Parham, W.E.; Dooley, J.F.; Meilahn, M.K.; Greidanus, J.W. *J. Org. Chem.* 1969, **34**, 1474 [↑](#endnote-ref-7)
7. Seki, M.; Kubota, H.; Matsumoto, K.; Kinumaki, A.; Da-te, T.; Okamura, K. *J. Org. Chem.* 1993, **58**, 6354.

   ********* [↑](#endnote-ref-8)
